# Supplementary material for: First-principles prediction of ferroelectric Janus Si2XY (X/Y = S/Se/Te, X ≠ Y) monolayers with negative Poisson's ratios
Source: Royal Society of Chemistry journal article supplement (doi:10.1039/d3cp05107b), 2024-01-01
Supplement: d3cp05107b1.pdf [file d3cp05107b1.pdf]

## Supplementary information (SI) for

# First-principles prediction of ferroelectric Janus Si<sub>2</sub>XY (X/Y = S/Se/Te, X ≠ Y) monolayer with negative Poisson Ratios

Yunlai Zhu <sup>a</sup>, Zihan Qu <sup>a</sup>, Jishun Zhang <sup>a</sup>, Xiaoteng Wang <sup>a</sup>, Shuo Jiang <sup>a</sup>, Zuyu Xu <sup>a</sup>,  
Fei Yang <sup>a</sup>, Zuheng Wu <sup>a\*</sup>, and Yuehua Dai <sup>a\*</sup>

<sup>a</sup> School of Integrated Circuits, Anhui University, Hefei, Anhui, 230601, China.

## Corresponding Authors

\*E-mail: [wuzuheng@ahu.edu.cn](mailto:wuzuheng@ahu.edu.cn) (Z.-H. Wu), [daiyuehua2013@163.com](mailto:daiyuehua2013@163.com) (Y.-H. Dai)

Table 1. Calculated in-plane elastic constants  $C_{ij}$  (N m<sup>-1</sup>) of Si<sub>2</sub>SSe, Si<sub>2</sub>STe and Si<sub>2</sub>SeTe monolayer.

|                      | $C_{11}$ | $C_{12}$ | $C_{22}$ | $C_{66}$ |
|----------------------|----------|----------|----------|----------|
| Si <sub>2</sub> SSe  | 89.753   | -7.361   | 60.272   | 8.741    |
| Si <sub>2</sub> STe  | 76.360   | -4.569   | 68.590   | 7.916    |
| Si <sub>2</sub> SeTe | 67.235   | -5.612   | 68.397   | 6.641    |

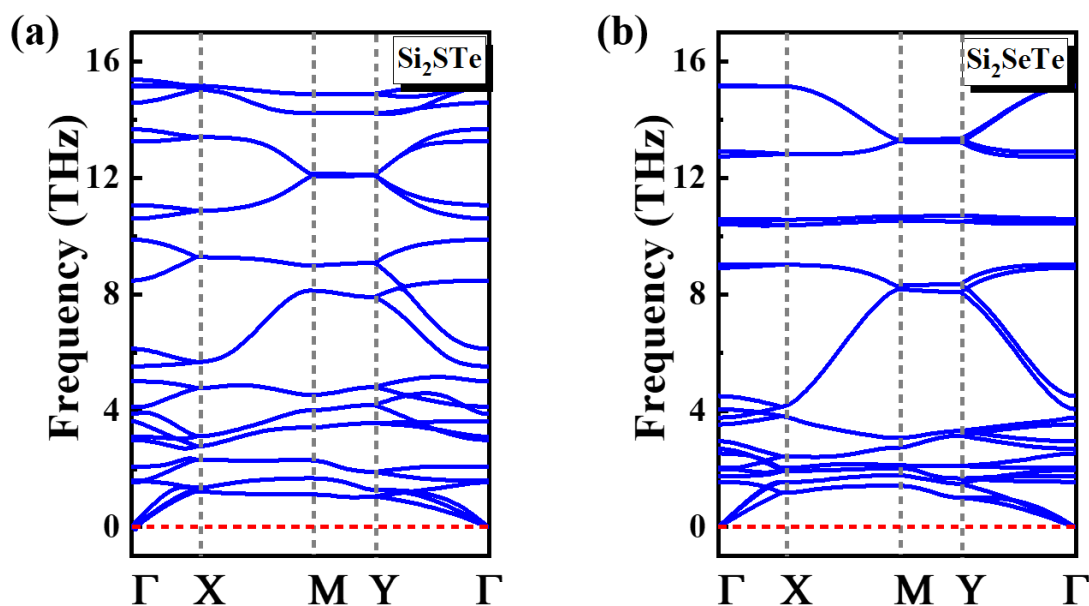

Fig.S1 Phonon dispersion of (a) Si<sub>2</sub>STe and (b) Si<sub>2</sub>SeTe monolayer, respectively.

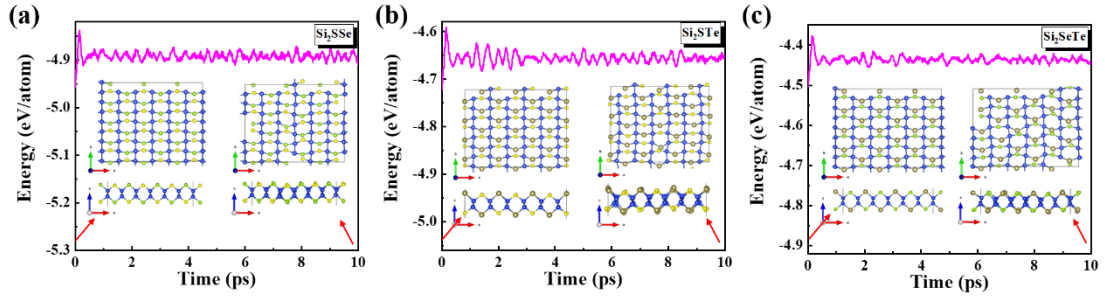

Fig.S2 Total potential energy fluctuation and snapshots of atomic structure of (a)  $\text{Si}_2\text{SSe}$ , (b)  $\text{Si}_2\text{STe}$  and (c)  $\text{Si}_2\text{SeTe}$  monolayer at a temperature of 500 K from AIMD simulation under 0 ps and 10 ps.

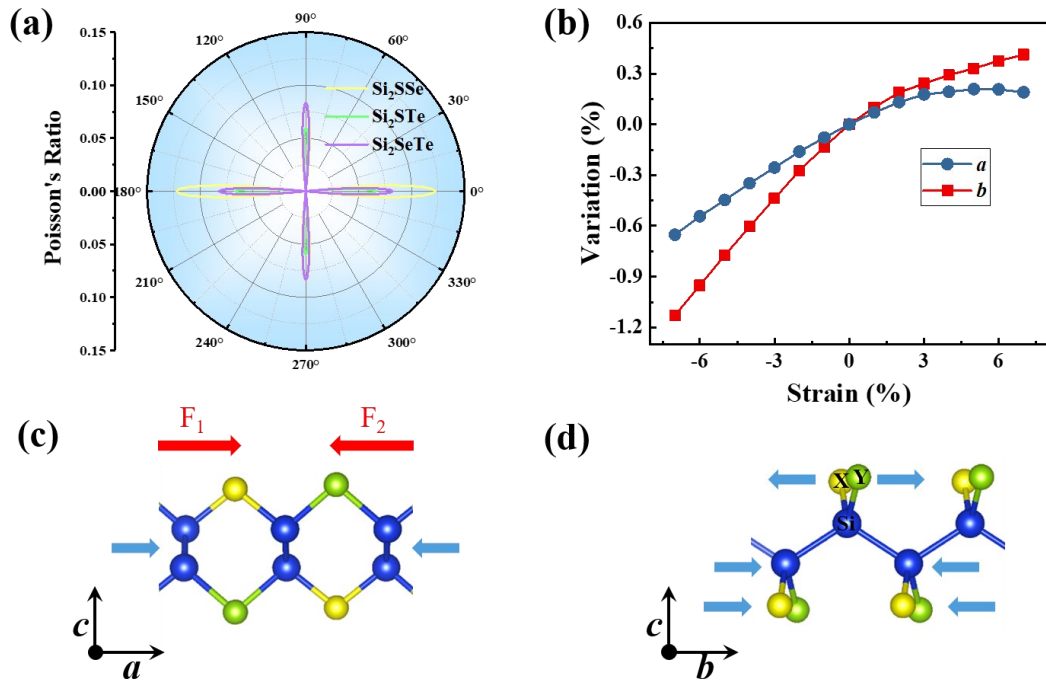

Fig.S3 (a) The NPR of Janus  $\text{Si}_2\text{XY}$  monolayer as a function of the in-plane angle  $\theta$ . The blue, pink and purple line represent  $\text{Si}_2\text{SSe}$ ,  $\text{Si}_2\text{STe}$  and  $\text{Si}_2\text{SeTe}$ , respectively. (b) The strain-variation curve about the strain on  $a$ -axis with respect to the  $b$  direction. The evolution of local structures of the Janus  $\text{Si}_2\text{XY}$  monolayer in the  $a$ - $c$  (c) and  $b$ - $c$  (d) planes under uniaxial compression strain.

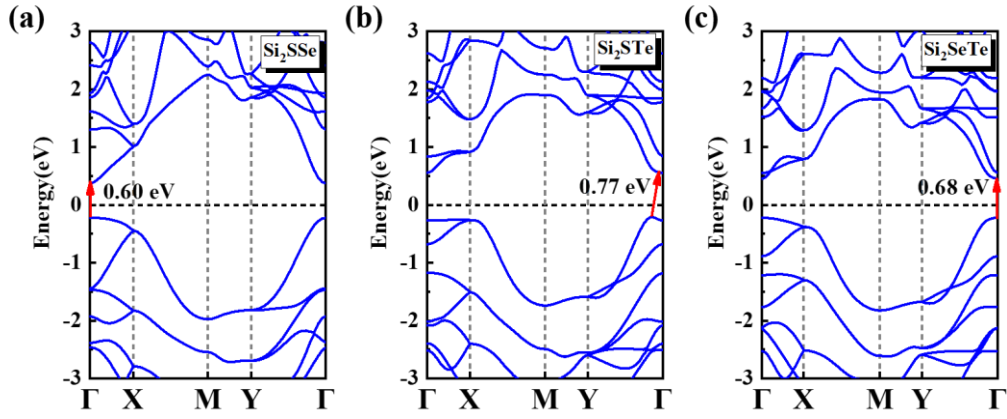

Fig.S4 Electronic band structures of (a)  $\text{Si}_2\text{SSe}$ , (b)  $\text{Si}_2\text{STe}$  and (c)  $\text{Si}_2\text{SeTe}$  monolayer with PBE calculation, respectively.

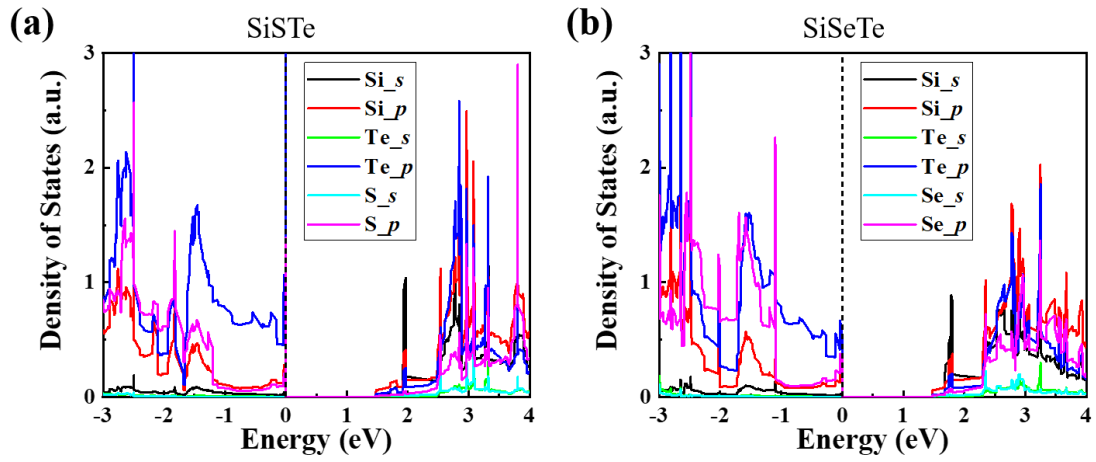

Fig.S5 The corresponding partial density of state (PDOS) of (a)  $\text{Si}_2\text{STe}$  and (b)  $\text{Si}_2\text{SeTe}$  monolayer, respectively.

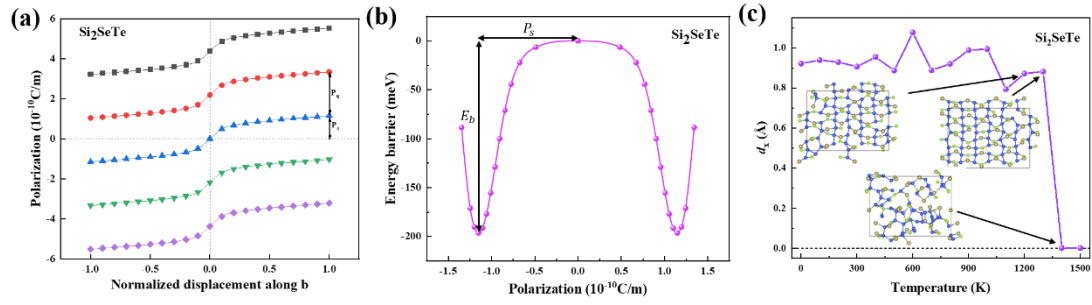

Fig.S6 (a) Polarization  $P$  of monolayer  $\text{Si}_2\text{SeTe}$  as a function of normalized displacement along the  $b$ -axis.  $P_s$  and  $P_q$  represent the spontaneous and quanta polarization, respectively. (b) Energy curve with the  $P_s$  of  $\text{Si}_2\text{SeTe}$ . Phase transition barrier  $E_b$  and  $P_s$  are marked. (c) Temperature dependence of the average relative displacement between ions in  $\text{Si}_2\text{SeTe}$  using MD simulations. The final atomic structures of  $\text{Si}_2\text{SeTe}$  near the phase transition temperature are depicted.

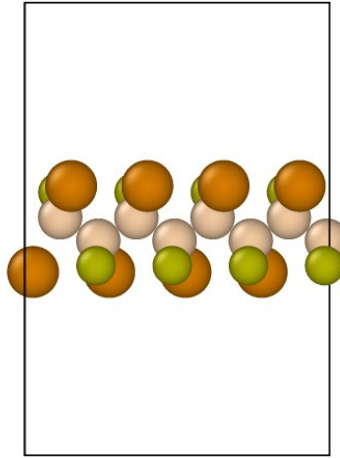

Fig.S7 The AIMD simulations of  $\text{Si}_2\text{STe}$  monolayer with the time step of 4 ps at the temperature of 1200 K. The white, green and orange balls denote Si, S and Te atoms, respectively.

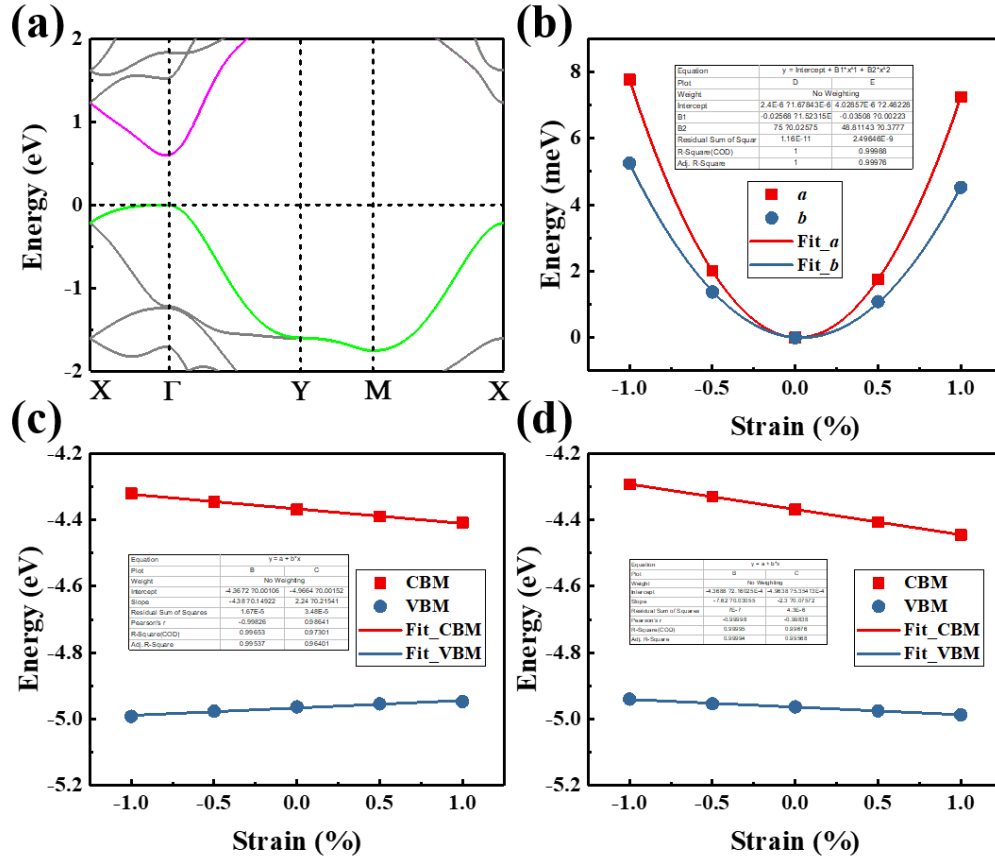

Fig.S8 (a) Electronic band structure of monolayer  $\text{Si}_2\text{SSe}$  with PBE method. (b) The energy shifting and band-edge positions as a function of the (c)  $a$ -axis and  $b$ -axis strain along two transport directions of  $\text{Si}_2\text{SSe}$  monolayers. The solid lines indicate the fitting curves.

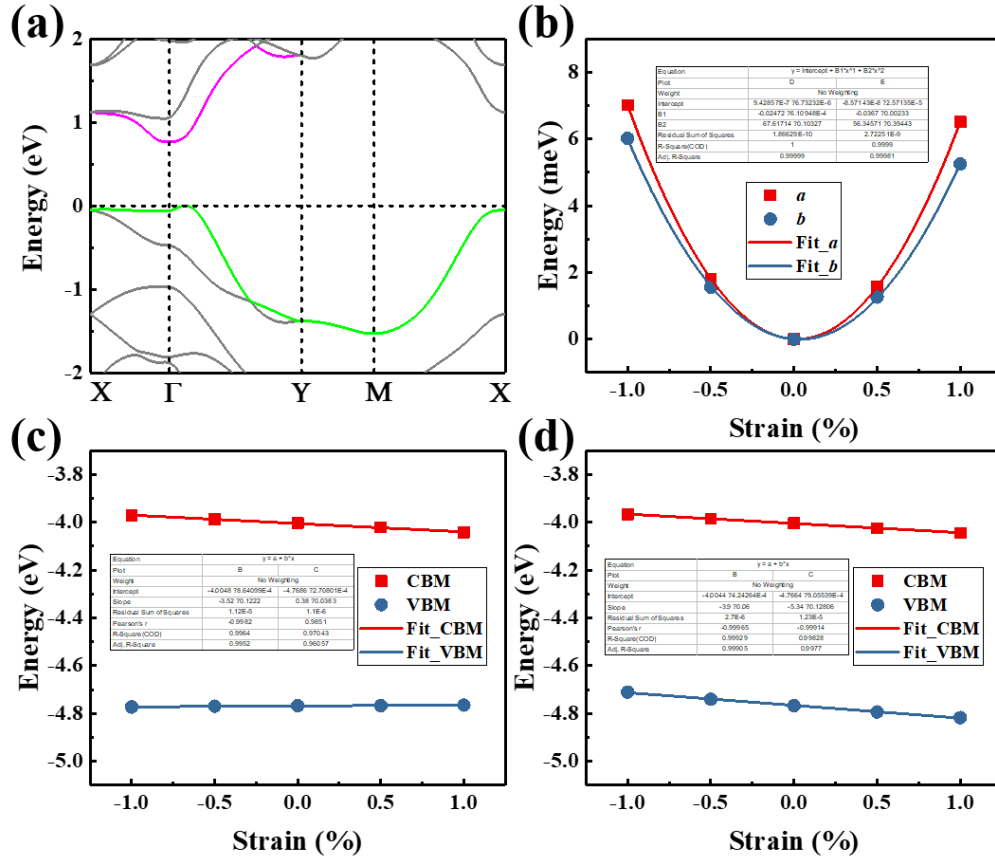

Fig.S9 (a) Electronic band structure of monolayer Si<sub>2</sub>STe with PBE method. (b) The energy shifting and band-edge positions as a function of the (c)  $a$ -axis and  $b$ -axis strain along two transport directions of Si<sub>2</sub>TSe monolayers. The solid lines indicate the fitting curves.

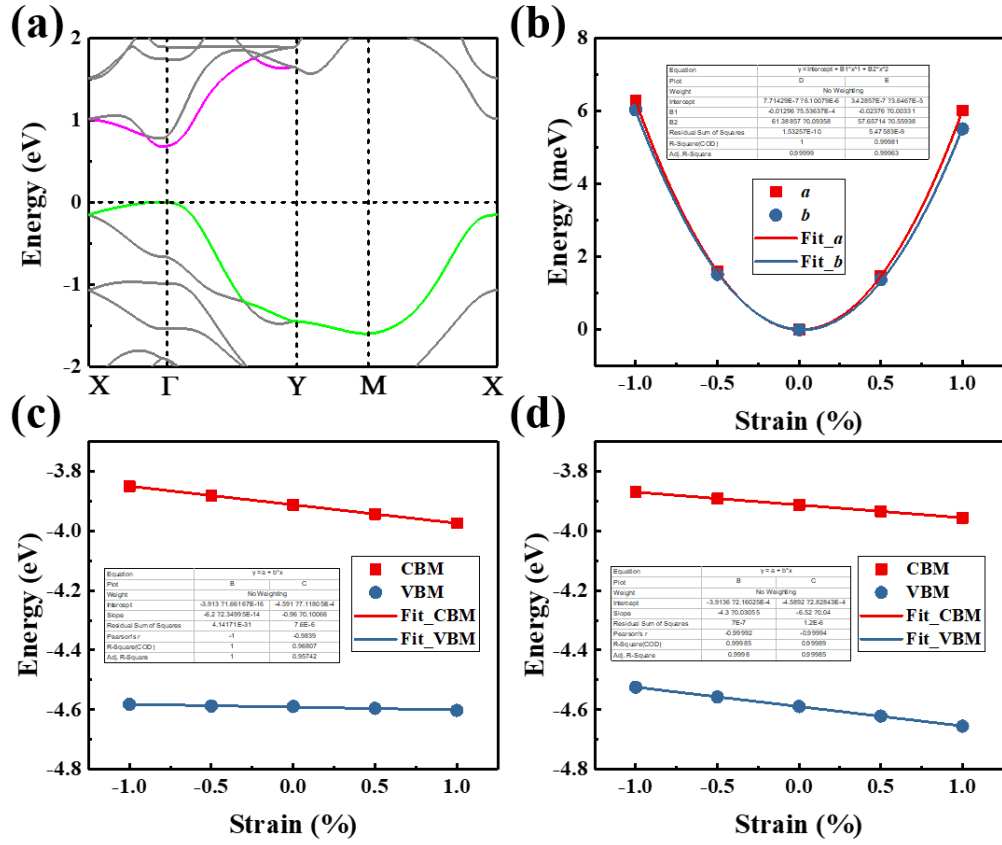

Fig.S10 (a) Electronic band structure of monolayer  $\text{Si}_2\text{SeTe}$  with PBE method. (b) The energy shifting and band-edge positions as a function of the (c)  $a$ -axis and  $b$ -axis strain along two transport directions of  $\text{Si}_2\text{SeTe}$  monolayers. The solid lines indicate the fitting curves.
